# Supplementary material for: Exploring the barriers and facilitators of mental health service utilization at primary health care facilities in Syangja district Nepal: Perspective of patients and health service providers
Source: Research Square preprint supplement (doi:10.21203/rs.3.rs-7281265/v1), 2025-09-15
Supplement: Supplementary file 1 [file 47eb99117bb6ba4e9fd649c8.docx]

# **In-depth Interview and Key Informant Interview Guidelines for Patients, Health workers and Health section Chief**

Research Title: Exploring the barriers and facilitators of mental health service utilization at primary health care facilities in Syangja district Nepal: Perspective of patients and health service providers

# **1. In-depth Interview for Patients**

1.1 ID N.o………………….

1.2 Sex of interviewee…………………...

1.3 Age …………………………

| Research Title: Factors Influencing the Utilization of Mental Health Services from Primary Health Care facilities at Syangja district | | | |
| --- | --- | --- | --- |
| Start of the interview with ice breaking question | | | |
| Themes | Main Questions | Follow up questions | Probing |
| Ice breaking | Could you please provide your brief introduction?  How are you doing these days? |  |  |
| 1.Mental Health Service Utilization  मानसिक स्वास्थ सेवा उपयोग | 1.1 Can you please share your experiences on receiving services for mental illness? | 1.Where did you get diagnose for the first time?  2 How did you know the service here in Health Post/PHC  What services are you seeking from here?  3.Are you satisfied with the services? If Yes why …if No why not?? | Use of Formal mental health service and referral system ...  Number of follow up … |
| 2.Facilitators to service Utilization | 2.1 What encouraged you to seek services, here in HP/PHC?  2.2 How supportive has your family or community been in addressing mental health needs | 1.Was there a person, event, or condition that motivated you to seek services from here?  2.What role do you think the local health facility plays in promoting mental health care? |  |
| 3.What are the barriers to service utilization? | 3.1 Did you face any problem while receiving services from here/while coming here?  3.2 Can you please share what challenges did you face while trying access to mental health services?    3.3 What were the factors that create barriers in receiving mental health care? | 1.How comfortable do you feel discussing mental health concerns with health care providers | Can you describe a specific incident where accessing services was difficult?  Community support?  Family support?  Health workers behaviors?  Financial resources? |
| 3.Strategies for improvement | 3.1 By your experiences what do you think what changes or improvements do you think could make mental health services better or easier to access? |  |  |
| Any suggestion? Or anything you would like to add on? | | | |

# **2. KII for Health Workers**

- 1. .ID N.o ……………...
  2. Age of interviewee………………
  3. Sex of interviewee
  4. Years of experience ……………………
  5. Current workplace (Name of health facilities) ………………………...
  6. Current Position …………………………………...

| Research Title: Factors Influencing the Utilization of Mental Health Services from Primary Health Care facilities at Syangja district | | |
| --- | --- | --- |
| Topic and issues | Main Questions | Probing |
| Ice breaking | Can you briefly describe your role and responsibilities at this health facility?  How long have you been working in this facility or district? |  |
| Mental Health Services utilization | 1.What mental health services are currently provided at this facility  2.How often do patients seek mental health services here?  3.How equipped is the facility to handle mental health cases  4.How do you incorporate the patients left untreated in community? | How often are these services utilized?  Has demand increased or decreased  in terms of staff, infrastructure, resources  Diagnosis, treatment, psychosocial support …?  Referral to tertiary service?  Evidence based identification and treatment guideline |
| Facilitors to mental health service utilization | 1.What factors have helped you in providing mental health services  2.What factors have you observed that encourage patients to utilize mental health services?  3.How do you think patients perceive the mental health services provided here?  Do people from this community visit this facility for seeking mental health services? Why, why not?) | Can you recall any specific cases or success stories  Any Supervision system?  Provision of home visit by FCHV?  Willingness to provide service?? |
| Barriers to mental health service utilization | 1.What is your experience in dealing with mental health issues at this facility  2.What are the biggest challenges you face in delivering mental health services?  3.From your experience, what barriers do patients face when accessing mental health services? | How do issues like workload, lack of training, or stigma affect service delivery?  Are there support systems, community initiatives, or government programs that facilitate your work  Shortage of psychotropic medicines …  Dropout  Defaulter  Not going to referral place |
| Strategies for improvement | In your opinion, what strategies could improve the utilization of mental health services at PHC facilities |  |

# **3. KII for Health Section Chief**

- 1. ID code ……………………….
  2. Age of interviewee………………
  3. Sex of the interviewee……………….
  4. Years of experience………...
  5. Current workplace (Name of municipality /RM/District) ……………

| Topic And issues | Main Question | Probing |
| --- | --- | --- |
|  |  |  |
| Ice breaking | Can you briefly describe your role and responsibilities as a health administrator?  How involved are you in mental health program planning and implementation at the PHC level? |  |
| Mental Health Service Utilization | 1. How would you describe the current state of mental health services at PHC facilities in this district?  Based on your experience, how would you describe the level of utilization of mental health services at PHC facilities? | 1. Medication management …? 2. Referral management? 3. Policy 4. Funding 5. Support |
| Barriers to mental health service utilization | 1.In your experience, what are the main barriers patients face when seeking mental health services at PHC facilities?  2.What administrative or systemic challenges limit the effective delivery of mental health services? | Are there gaps in staffing, training, or infrastructure that hinder service delivery?  How do community perceptions and cultural beliefs influence the demand for mental health services?  (Basic Health Service Package …)  Frequent transfer of trained health workforce? (manage) |
| Facilitators to mental health services | 1.What are the factors that support utilization of mental health services by community people in primary health care facilities in this district?  2.How do community health workers (FCHVs) contribute to mental health promotion and service uptake | Any Awareness programs?  outreach initiatives? Or partnerships that have been effective?  Are there any success stories or positive outcomes from past mental health initiatives |
| Strategies for improvement? | 1.In your opinion, what strategies could improve the utilization of mental health services at PHC facilities.  2.What do you think should be done to address those factors hindering utilization and delivery of mental health services at PHC?  3.From your perspective, what is the most urgent priority to improve mental health services at PHC facilities?  4.How can the integration of mental health services can be strengthened? | Any budget?  How can service delivery models be enhanced to reach underserved populations?  Are there specific areas where additional resources or support are needed? |
| Ending question: Is there anything else you would like to add regarding mental health service /utilization in Syangja District | | |
